# Supplementary material for: Healthcare resource utilisation pattern and costs associated with herpes simplex virus diagnosis and management: a systematic review
Source: HighWire-hosted journal article supplement (doi:10.1136/bmjopen-2021-049618), 2022-01-01

**APPENDIX****TABLE OF CONTENTS**

|                                                                                                                            |    |
|----------------------------------------------------------------------------------------------------------------------------|----|
| Search methodology .....                                                                                                   | 2  |
| Text 1: Keyword terms used in the search.....                                                                              | 3  |
| Text 2: Keywords used in focused search using exploding terms.....                                                         | 4  |
| Table 1: Summary of included studies reporting healthcare costs and/or resource utilization related to HSV infection ..... | 5  |
| Table 2: Detailed description of studies reporting cost (unit cost) .....                                                  | 13 |
| Table 3: Detailed description of studies reporting resource utilization .....                                              | 19 |
| Table 4: Detailed cost incurred in genito-ulcer diseases due to HSV .....                                                  | 22 |
| Table 5: Detailed cost associated with genitoulcer disease prevention in people living with HIV .....                      | 25 |
| Table 6: Detailed cost associated with neonatal herpes prevention/management.....                                          | 26 |
| Figure 1: Methodological quality of included economic studies using CHEC Checklist.....                                    | 30 |
| Figure 2: Methodological quality of included costing studies using Larg and Moss Checklist ...                             | 31 |

## Search methodology

### 1. Search strategy

- The current search strategy was developed based upon keywords which have been used in previous existing HSV reviews commissioned by WHO. All search keywords used were subsequently cross-checked with the following articles to ensure comprehensiveness
  - Looker, 2017. Effect of HSV-2 infection on subsequent HIV acquisition: an updated systematic review and meta-analysis
  - Khard, 2019. The Epidemiology of Herpes Simplex Virus Type 1 in Asia: Systematic Review, Meta-analyses, and Meta-regressions
  - Looker, 2012. Global estimates of prevalent and incident herpes simplex virus type 2 infections in 2012. *PLoS One* 2015;10(1) : e114989-e89. Doi: 10.1371/journal.pone.0114989
- The following databases were identified for the search including: PubMed, PsychINFO, EMBASE, Centre for Review and Dissemination, EconLit, CEA registry and WHO Library Database (WHOLIS)

2. **Keywords search** was revised to compare between a) search including exploding terms and b) search including title and abstract. A total of 10,113 articles was found for search when terms were exploded versus 5,966 when these terms were not exploded. As such, the methods will only use search including exploding terms to minimize the risk of missing relevant study despite its low specificity. The initial search was performed in April 2019, with an updated search in October 2019.

### 3. Neonate search

- We also conducted search over again using all relevant HSV terms with neonate as keyword. All articles identified in the search overlapped with existing broader search, thereby there is no need to add neonate as key words

**Text 1: Keyword terms used in the search**

| No. | Keyword                                                                                            |
|-----|----------------------------------------------------------------------------------------------------|
| #1  | Genital ulcer disease.mp.                                                                          |
| #2  | Herpes labialis.mp.                                                                                |
| #3  | Herpes genitalis.mp.                                                                               |
| #4  | Genital herpes.mp.                                                                                 |
| #5  | Herpesvirus.mp.                                                                                    |
| #6  | Herpes virus.mp.                                                                                   |
| #7  | HSV.mp.                                                                                            |
| #8  | Herpes simplex.mp.                                                                                 |
| #9  | 1 or 2 or 3 or 4 or 5 or 6 or 7 or 8                                                               |
| #10 | Healthcare util*ation.mp.                                                                          |
| #11 | Util*ation.mp.                                                                                     |
| #12 | Physician visit.mp.                                                                                |
| #13 | General practitioner visit.mp.                                                                     |
| #14 | Hospital visit.mp.                                                                                 |
| #15 | Clinic visit.mp.                                                                                   |
| #16 | Hospital stay.mp.                                                                                  |
| #17 | Hospitali*ation.mp.                                                                                |
| #18 | Hospital readmission.mp.                                                                           |
| #19 | Cost.mp.                                                                                           |
| #20 | Cost-effectiveness.mp.                                                                             |
| #21 | Cost-utility.mp.                                                                                   |
| #22 | Cost-benefit.mp.                                                                                   |
| #23 | Cost-minimi*ation.mp.                                                                              |
| #24 | Counselling.mp.                                                                                    |
| #25 | Seek care.mp.                                                                                      |
| #26 | Behavio*r.mp.                                                                                      |
| #27 | 10 or 11 or 12 or 13 or 14 or 15 or 16 or 17 or 18 or 19 or 20 or 21 or 22 or 23 or 24 or 25 or 26 |
| #28 | 9 and 27                                                                                           |

**Text 2: Keywords used in focused search using exploding terms.**

| No. | Keyword                              |
|-----|--------------------------------------|
| #1  | Genital ulcer disease.mp.            |
| #2  | Herpes labialis.mp.                  |
| #3  | Herpes genitalis.mp.                 |
| #4  | Genital herpes.mp.                   |
| #5  | Herpesvirus.mp.                      |
| #6  | Herpes virus.mp.                     |
| #7  | HSV.mp.                              |
| #8  | Herpes simplex.mp.                   |
| #9  | 1 or 2 or 3 or 4 or 5 or 6 or 7 or 8 |
| #10 | pregnancy.mp.                        |
| #11 | pregnant.mp.                         |
| #12 | c*esarean.mp.                        |
| #13 | delivery.mp.                         |
| #14 | 10 or 11                             |
| #15 | 12 or 13                             |
| #16 | 9 AND 14 AND 15                      |

Table 1: Summary of included studies reporting healthcare costs and/or resource utilization related to HSV infection

| Author, year<br>Country                                   | Population and<br>setting                                                   | Study design        | Study objective                                                                                                                                                                                                                                                                                                 | Sample<br>size | HSV-subtype |   | Cost data                          |               | Healthcare<br>resource utilization |               |
|-----------------------------------------------------------|-----------------------------------------------------------------------------|---------------------|-----------------------------------------------------------------------------------------------------------------------------------------------------------------------------------------------------------------------------------------------------------------------------------------------------------------|----------------|-------------|---|------------------------------------|---------------|------------------------------------|---------------|
|                                                           |                                                                             |                     |                                                                                                                                                                                                                                                                                                                 |                | 1           | 2 | Healthcar<br>e delivery<br>process | Treat<br>ment | Healthcar<br>e delivery<br>process | Treat<br>ment |
| <b>HSV genital ulcer disease among adults/adolescents</b> |                                                                             |                     |                                                                                                                                                                                                                                                                                                                 |                |             |   |                                    |               |                                    |               |
| Almonte-Vega, 2020<br>USA <sup>39</sup>                   | General population aged 15-49 years old                                     | Cost-analysis       | To study the dynamics of HSV-2 transmission, control and impact of treatment policies                                                                                                                                                                                                                           | -              |             | x |                                    | x             |                                    |               |
| Aslam, 2012<br>Canada <sup>18</sup>                       | Records of individuals in the Canadian Disease and Therapeutic Index (CDTI) | Retrospective study | To investigate the rates of diagnosed cases of GH in Canada from 2002 to 2007                                                                                                                                                                                                                                   | 652            |             |   |                                    |               | x                                  |               |
| Desharnais, 1996<br>USA <sup>44</sup>                     | Adults with herpes diagnosis from the HCIA Clinical Pathways Data Base      | Retrospective study | To describe patterns of antiviral drug use for patients hospitalized with chickenpox, herpes simplex, and herpes zoster infections, and also for a subgroup of herpes patients with severe infections (systemic infections, eye infections, encephalitis, hemorrhagic pneumonitis, and other severe conditions) | 3011           | x           | x |                                    | x             |                                    | x             |
| Fisman, 2002<br>USA <sup>38</sup>                         | Individuals aged 15 to 39 years                                             | Cost-effectiveness  | To project the future burden of HSV-2 infection in the United States, using a                                                                                                                                                                                                                                   | -              |             | x | x                                  | x             |                                    |               |

|                                       |                                          |                     |                                                                                                                                                                                                                    |                                          |   |   |   |   |   |   |
|---------------------------------------|------------------------------------------|---------------------|--------------------------------------------------------------------------------------------------------------------------------------------------------------------------------------------------------------------|------------------------------------------|---|---|---|---|---|---|
|                                       |                                          |                     | mathematical model that incorporated epidemiologic trends documented between 1976 and 1994                                                                                                                         |                                          |   |   |   |   |   |   |
| Fisman, 2003 USA <sup>52</sup>        | Heterosexual couples                     | Modelling study     | To evaluate the projected cost effectiveness of strategies to prevent HSV-2 transmission in couples with no history of HSV-2 infection                                                                             | -                                        |   | x |   | x |   |   |
| Fisman, 2005 Canada <sup>19</sup>     | Individuals with recurrent genital ulcer | Prospective study   | To estimate the impact on health-related quality of life associated with both symptomatic and asymptomatic GH                                                                                                      | 39                                       | x | x |   |   |   | x |
| Gilbert, 2010 USA <sup>20</sup>       | Young adults                             | Retrospective study | To investigate characteristics associated with GH screening and diagnosis in sexually active young adults aged 18 to 24                                                                                            | Add Health Data: 11,570<br>NCHA: 222,740 | x | x |   |   | x |   |
| Korenromp, 2017 <sup>37</sup>         | People 15-49 year old living with HSV-2  | Modelling study     | To estimate the costs of reaching the 2020 STI strategy milestones for the period 2016–2021, to support policy, planning, implementation, and future cost-benefit evaluation of the global STI strategy 2016–2021. | -                                        |   | x | x | x |   |   |
| Owusu-Edusei, 2013a USA <sup>34</sup> | People aged 15-25 years                  | Retrospective study | To examine the utilization and cost of the diagnostic methods used for STI screening among                                                                                                                         | -                                        |   | x | x |   |   |   |

|                                                                |                              |                          |                                                                                                                                                               |         |   |   |   |   |   |   |
|----------------------------------------------------------------|------------------------------|--------------------------|---------------------------------------------------------------------------------------------------------------------------------------------------------------|---------|---|---|---|---|---|---|
|                                                                |                              |                          | privately insured adolescent and young adult population                                                                                                       |         |   |   |   |   |   |   |
| Owusu-Edusei, 2013b USA <sup>30</sup>                          | -                            | Cost of illness analysis | To update the estimates of lifetime direct medical cost for 8 major STI                                                                                       | -       |   |   |   | x |   |   |
| Patrick, 2004 Worldwide survey from 78 countries <sup>21</sup> | Subjects with genital herpes | Survey                   | To describe patient experiences and views regarding genital herpes management                                                                                 | 2075    | x | x |   |   | x | x |
| Szucs, 2001 USA <sup>31</sup>                                  | General population           | Economic analysis        | To estimate the economic burden of GH in the USA, using two different costing approaches                                                                      | 465,075 |   |   | x | x |   |   |
| Tao, 2000 USA <sup>22</sup>                                    | General population           | Cost-of-illness analysis | To assess the US direct medical expenditures for genital herpes and its complications to assist policy makers in allocating limited STD resources efficiently | -       |   | x |   |   | x |   |
| Vickerman, 2008 UK <sup>33</sup>                               | -                            | Cost-effectiveness       | To compare the cost per ulcer treated of using the 1994 and 2003 algorithms amongst individuals presenting with GUD                                           | -       |   | x |   | x |   |   |
| Vickerman, 2011 South Africa <sup>32</sup>                     | HIV+ women                   | Cost-effectiveness       | To estimate the cost-effectiveness of daily acyclovir for delaying HIV-1 disease progression in women not eligible for antiretroviral therapy (ART)           | 300     |   | x |   | x |   |   |

|                                                        |                                                                                          |                     |                                                                                                                                                                           |           |   |   |   |   |   |   |
|--------------------------------------------------------|------------------------------------------------------------------------------------------|---------------------|---------------------------------------------------------------------------------------------------------------------------------------------------------------------------|-----------|---|---|---|---|---|---|
| Xia, 2018<br>United States <sup>40</sup>               | General population                                                                       | Retrospective study | To determine the utilization and cost burden associated with HSV infection visits to U.S. EDs in recent years from 2006-2013                                              | 704,728   |   |   | x |   | x |   |
| <b>Neonatal herpes prevention among pregnant women</b> |                                                                                          |                     |                                                                                                                                                                           |           |   |   |   |   |   |   |
| Baker, 2004<br>USA <sup>42</sup>                       | -                                                                                        | Cost-effectiveness  | To determine whether serologic testing for herpes simplex virus type 2 (HSV-2) in pregnant women and their partners is cost-effective                                     | 100,000   |   | x |   | x | x | x |
| Barnabas, 2002 <sup>29</sup><br>USA                    | -                                                                                        | Cost-effectiveness  | To assess the potential effectiveness, cost effectiveness, and benefit of suppressive therapy among herpes simplex virus serodiscordant sex partners during pregnancy     |           | x | x | x | x |   |   |
| Binkin, 1989<br>USA <sup>43</sup>                      | Pregnant women with HSV                                                                  | Cost-effectiveness  | To present a reanalysis of the cost effectiveness of maternal herpes screening and a review of the changes that have occurred in the screening recommendations since 1980 | 3,600,000 | x | x | x | x | x |   |
| Brocklehurst, 1995<br>UK <sup>23</sup>                 | All members and Fellows of the Royal College of Obstetricians and Gynaecologist resident | Survey              | To determine the clinical practice among obstetricians in the antepartum and intrapartum management of women with recurrent genital herpes infection                      | 2252      | x | x |   |   | x | x |
| Brown, 2003<br>USA <sup>27</sup>                       | Pregnant women from university,                                                          | Cohort study        | To determine the effects of viral shedding, maternal HSV                                                                                                                  | 58362     | x | x |   |   |   | x |



|                                     |                                                                                                 |                        |                                                                                                                                                                                                                                     |        |   |   |   |   |   |   |
|-------------------------------------|-------------------------------------------------------------------------------------------------|------------------------|-------------------------------------------------------------------------------------------------------------------------------------------------------------------------------------------------------------------------------------|--------|---|---|---|---|---|---|
|                                     | army and community hospitals                                                                    |                        | serological status and delivery route on risk of transmission of HSV from mother to infant                                                                                                                                          |        |   |   |   |   |   |   |
| Heggarty, 2020 France <sup>28</sup> | Healthcare providers for pregnant women                                                         | Survey                 | To evaluate health care provider knowledge, and collect information on management of genital herpes during pregnancy and infants born to mothers with herpes                                                                        | 354    | x | x |   |   | x | x |
| Kenny, 2013 Canada <sup>26</sup>    | Obstetrician, gynaecologist and family physicians offering maternity care practicing in Alberta | Survey                 | To identify the practice patterns of physicians providing prenatal care in Alberta with respect to prevention of neonatal HSV infection, including their prescribing of antiviral therapy to pregnant women in the third trimester. | 183    | x | x |   |   | x | x |
| Little, 2005 USA <sup>46</sup>      | Women with a history of diagnosed genital HSV                                                   | Cost-effectiveness     | To determine the clinical benefits and cost-effectiveness of prophylactic acyclovir in women with a history of HSV but no recurrence during pregnancy                                                                               | -      | x | x |   | x |   | x |
| Lynn, 2017 Ireland <sup>24</sup>    | Pregnant women with genital HSV from a university hospital                                      | Antenatal chart review | To describe the HSV management in pregnancy at a joint antenatal genital maternity hospital                                                                                                                                         | 107    | x | x |   |   | x | x |
| Randolph, 1996 USA <sup>47</sup>    | Antenatal women with recurrent genital HSV                                                      | Cost-effectiveness     | To compare the cost-effectiveness of oral acyclovir prophylaxis in late pregnancy compared to caesarean delivery for genital herpes                                                                                                 | 10,000 |   |   | x | x |   |   |

|                                            |                                |                     |                                                                                                                                                                     |         |   |   |   |   |   |  |
|--------------------------------------------|--------------------------------|---------------------|---------------------------------------------------------------------------------------------------------------------------------------------------------------------|---------|---|---|---|---|---|--|
|                                            |                                |                     | lesions in the prevention of neonatal herpes transmission from mothers with recurrent genital infections                                                            |         |   |   |   |   |   |  |
| Rouse, 2000 USA <sup>48</sup>              | Antenatal women                | Cost-effectiveness  | To evaluate the potential cost effectiveness of herpes simplex virus antibody screening                                                                             | 8,538   | x | x | x | x | x |  |
| Scott, 1998 USA <sup>35</sup>              | -                              | Cost-effectiveness  | To determine whether acyclovir suppression provides a greater cost savings over no medical therapy in the management of recurrent genital herpes (HSV) in pregnancy | -       | x | x | x | x |   |  |
| Stankiewicz Karita, 2017 USA <sup>25</sup> | Pregnant women from a hospital | Retrospective study | To investigate the frequency of invasive obstetric procedures and caesarean deliveries for women with known HSV infection                                           | 449     |   | x |   |   | x |  |
| Thung, 2005 USA <sup>49</sup>              | Married women                  | Cost-effectiveness  | To determine the cost-effectiveness of routine antenatal screening for HSV-1 and HSV-2 in women without a known history of genital herpes.                          | 100,000 | x | x |   | x |   |  |
| Tuite, 2010 Canada <sup>36</sup>           | Pregnant women                 | Cost-effectiveness  | To assess the effectiveness and cost effectiveness of identifying pregnant women at risk of de novo HSV acquisition to prevent vertical HSV transmission            | 100,000 | x | x | x | x |   |  |

| Neonatal herpes management         |                                                                                                              |                     |                                                                                                                                                                                                                                                                                        |             |   |   |  |   |  |   |
|------------------------------------|--------------------------------------------------------------------------------------------------------------|---------------------|----------------------------------------------------------------------------------------------------------------------------------------------------------------------------------------------------------------------------------------------------------------------------------------|-------------|---|---|--|---|--|---|
| Ahmad, 2015 USA <sup>15</sup>      | Neonates who sought care in emergency department                                                             | Retrospective study | To evaluate whether guideline implementation affected the ED's decision to test for HSV, ED use of HSV polymerase chain reaction (PCR) and acyclovir                                                                                                                                   | 308         | x | x |  |   |  | x |
| Ambroggio, 2009 USA <sup>41</sup>  | Neonates with HSV and received intravenous acyclovir and discharge from Paediatric Health Information System | Retrospective study | To quantify the economic burden of neonatal HSV during initial hospitalization while focusing on factors, such as congenital anomalies and HSV-associated complications, which increase hospital charges and length of hospital stay among neonates with HSV                           | 406         | x | x |  | x |  | x |
| Bernard, 2013 France <sup>16</sup> | Patients aged 28 days and above from the French national hospital discharge database                         | Prospective study   | To compare the data from the French national hospital discharge database (Programme de Medicalisation des Systemes d'Information; PMSI) and from the prospective study conducted in 2007 and evaluate the reliability of PMSI as a tool to assess the trends of encephalitis in France | 1,947       | x | x |  |   |  | x |
| Donda, 2019 USA <sup>45</sup>      | Neonates with ICD-9 codes for neonatal HSV in the National                                                   | Retrospective study | To examine the temporal trends in the incidence and outcomes of neonatal HSV in the United States                                                                                                                                                                                      | 42,726, 336 |   |   |  | x |  | x |

|                                      | Inpatient Sample from 2003-2014                                                                                                   |                          |                                                                                                                                                                                                                              |           |   |   |  |   |  |   |
|--------------------------------------|-----------------------------------------------------------------------------------------------------------------------------------|--------------------------|------------------------------------------------------------------------------------------------------------------------------------------------------------------------------------------------------------------------------|-----------|---|---|--|---|--|---|
| Flagg, 2011 USA <sup>51</sup>        | Inpatient records of infants aged 60 days or younger from the Healthcare Cost and Utilization Project Kids' Inpatient Database    | Retrospective study      | To estimate the incidence of HSV infections for the United States during 2006, as well as demographic-specific rates, by using nationally and regionally weighted estimates from a population-based sample of inpatient data | 4,106,488 | x | x |  | x |  | x |
| Mahant, 2019 USA <sup>50</sup>       | Records of neonates from the Medicaid claims database from 2009 - 2015                                                            | Retrospective study      | To examine the incidence, mortality, and health care use related to neonatal herpes HSV infection.                                                                                                                           | 2,107,124 |   |   |  | x |  | x |
| Owusu-Edusei, 2015 USA <sup>17</sup> | Insurance claim data on inpatient admission from the Truven Health Analytics MarketScan Commercial Claims and Encounters Database | Cost-of-illness analysis | To estimate the average excess inpatient cost of neonatal herpes simplex virus (NHSV) infection from 2005 to 2009 insurance claims data                                                                                      | 474,743   | x | x |  |   |  | x |

Table 2: Detailed description of studies reporting cost (unit cost)

| Author, year<br>Country                               | Population and setting                                         | Diagnostic costs (range)                        | Treatment costs* in original year of value (range)                                                                                                                                                         | Hospitalisation costs (range) | Other healthcare delivery costs (range)                                   | Lifetime management cost (range)                                                                                                                                                                                                                                  |
|-------------------------------------------------------|----------------------------------------------------------------|-------------------------------------------------|------------------------------------------------------------------------------------------------------------------------------------------------------------------------------------------------------------|-------------------------------|---------------------------------------------------------------------------|-------------------------------------------------------------------------------------------------------------------------------------------------------------------------------------------------------------------------------------------------------------------|
| <b>Genital ulcer disease among adults/adolescents</b> |                                                                |                                                 |                                                                                                                                                                                                            |                               |                                                                           |                                                                                                                                                                                                                                                                   |
| Almonte-Vega, 2020<br>USA <sup>39</sup>               | General population aged 15-49 years old                        | Microbiological lab test (unspecified): \$80.17 | Acyclovir treatment (duration not specified): \$86.33                                                                                                                                                      | NR                            | Consultation, clinical examination and diagnostic: \$161.85               | NR                                                                                                                                                                                                                                                                |
| Desharnais, 1996 <sup>44</sup>                        | Adults with herpes diagnosis identified from the HCIA database | NR                                              | Total drug charges: \$1941<br>Antiviral drug charges (not specified): \$1070                                                                                                                               | Hospital charges: \$5637      | NR                                                                        | NR                                                                                                                                                                                                                                                                |
| Fisman, 2002 <sup>38</sup>                            | Individuals aged 15 to 39 years                                | NR                                              | Cost of treatment for primary syndrome<br>Male: \$470 (\$370-5\$60)<br>Female: \$830 (\$670-\$1000)<br><br>Antiviral therapy<br>Relapse: \$17 (\$9-\$36)<br>Monthly suppressive therapy: \$40 (\$20-\$220) | NR                            | Clinic visit: \$120 (\$90-\$150)<br>Obstetrical care: \$310 (\$130-\$800) | Initial cost of caring for neonates with HSV: \$42,600<br>Lifetime medical and long-term care cost for infants with moderate neurological sequelae: \$97,000<br>Lifetime medical and long-term care cost for infants with severe neurological sequelae: \$291,000 |

|                                   |                                         |                                                         |                                                                                                                                                                                                          |    |                                                                              |                                                                                                                                                                          |
|-----------------------------------|-----------------------------------------|---------------------------------------------------------|----------------------------------------------------------------------------------------------------------------------------------------------------------------------------------------------------------|----|------------------------------------------------------------------------------|--------------------------------------------------------------------------------------------------------------------------------------------------------------------------|
| Fisman, 2003 <sup>52</sup>        | Heterosexual couples                    | Western blot: \$60 (\$45-\$90)<br>ELISA: \$5 (\$3-\$35) | Cost of treatment for primary syndrome<br>Male: \$450 (\$360-5\$40)<br>Female: \$800 (\$640-\$960)<br><br>Acyclovir (per episode): \$16 (\$9-\$35)<br>Acyclovir (monthly suppressive): \$40 (\$20-\$215) | NR | Clinic visit: \$120 (\$90-\$145)<br>Labour: \$120 (\$90-\$145)               | Lifetime cost of care of neonatal HSV-2: \$110,000 (\$85,000-\$860,000)                                                                                                  |
| Korenromp, 2017 <sup>37</sup>     | People 15-49 year old living with HSV-2 | NR                                                      | Acyclovir 400mg per tab: \$0.04                                                                                                                                                                          | NR | Treatment service delivery (not specified): \$10<br>Procurement cost: \$0.21 | NR                                                                                                                                                                       |
| Owusu-Edusei, 2013a <sup>34</sup> | People aged 15-25 years                 | Laboratory test (unspecified): \$24.30-27.05            | NR                                                                                                                                                                                                       | NR | NR                                                                           | NR                                                                                                                                                                       |
| Owusu-Edusei, 2013b <sup>30</sup> | -                                       | NR                                                      | NR                                                                                                                                                                                                       | NR | NR                                                                           | Lifetime medical cost per case, median(range):<br>Men: \$761 (381-1,142)<br>Women: \$621(311 - 932)<br>Lifetime cost of new infections acquired in 2008: \$435.9 million |

|                                                          |                    |                                                          |                                                                                                                                                                                                                        |                          |                                                                         |                                                            |
|----------------------------------------------------------|--------------------|----------------------------------------------------------|------------------------------------------------------------------------------------------------------------------------------------------------------------------------------------------------------------------------|--------------------------|-------------------------------------------------------------------------|------------------------------------------------------------|
| Szucs, 2001 <sup>31</sup>                                | General population | Laboratory test: \$1.5-76.50                             | Drug: \$64-131                                                                                                                                                                                                         | Hospitalisation: \$669   | Labour: \$39.8 -62.6<br>Clinic visit: \$36.20-73<br>Day off work: \$144 | NR                                                         |
| Vickerman, 2008 <sup>33</sup>                            | -                  | NR                                                       | Acyclovir 200mg tds for 5 days: \$0.53- 5.24                                                                                                                                                                           | NR                       | Counselling cost: \$0.28                                                | NR                                                         |
| Vickerman, 2011 <sup>32</sup>                            | HIV+ women         | NR                                                       | Acyclovir 400mg: \$0.07<br>Yearly ART cost: \$1700 (1359-2000)                                                                                                                                                         | NR                       | Staff costs/women 3m treatment cycle: \$15.60                           | NR                                                         |
| Xia, 2018 <sup>40</sup>                                  | General population | NR                                                       | NR                                                                                                                                                                                                                     | ED: \$1,069              |                                                                         |                                                            |
| <b>Neonatal herpes prevention among pregnant mothers</b> |                    |                                                          |                                                                                                                                                                                                                        |                          |                                                                         |                                                            |
| Baker, 2004 <sup>42</sup>                                | -                  | Laboratory test with labor cost for HSV-2: 15.58 – 60.00 | Average antiviral daily cost (assuming 50% on generic acyclovir 400mg tds and 50% on valacyclovir qd): \$1.70-7.90<br>Acyclovir 400mg: \$0.366- 1.955<br>Valacyclovir 500mg/tab: \$3.95<br>Valacyclovir 1g/tab: \$6.49 | Delivery: \$4,779-22,838 | Labour cost: \$15.58 – \$60<br>Counselling cost: \$5.98-\$6.67          | Lifetime cost of care of neonatal HSV: \$54,516- \$129,576 |

|                              |                                               |                             |                                                                                            |                                                                                                                                   |                                                        |                                                                                             |
|------------------------------|-----------------------------------------------|-----------------------------|--------------------------------------------------------------------------------------------|-----------------------------------------------------------------------------------------------------------------------------------|--------------------------------------------------------|---------------------------------------------------------------------------------------------|
| Barnabas, 2002 <sup>29</sup> | -                                             | Diagnostic cost: \$16-\$100 | Drug cost per couple per pregnancy: \$37<br>Acute neonatal herpes treatment \$1,500-50,000 | C/S cost (personnel, supplies, surgery and ward care): \$11,084                                                                   | Labour cost: \$200-1628<br>Counselling cost: \$12-\$19 | Neonatal care after C/S: \$884<br>Long term care for neonatal herpes: \$140,766 - \$273,712 |
| Binkin, 1989 <sup>43</sup>   | Pregnant women with HSV                       | Viral culture: \$30         | NR                                                                                         | Hospitalisation for complication: \$300-698<br>Hospital care associated with neonatal herpes: \$25,000<br>Delivery: \$2,300-3,600 | NR                                                     | Long term care for neonatal herpes: \$125,000-\$250,000                                     |
| Little, 2005 <sup>46</sup>   | Women with a history of diagnosed genital HSV | NR                          | Acyclovir (prophylaxis) from 36 weeks of gestation: \$46                                   | Delivery: \$4,939-9,490<br>Hospitalisation: \$32,483                                                                              | NR                                                     | Lifetime cost of care of neonatal HSV: \$349,7533-\$1,049,260                               |
| Randolph, 1996 <sup>47</sup> | Antenatal women with recurrent genital HSV    | Laboratory: \$35            | Acyclovir 400mg (200caps): \$228                                                           | Delivery: \$3,500                                                                                                                 | Labour: \$74                                           | Lifetime cost of care of neonatal HSV: \$85,000- 255,000                                    |
| Rouse, 2000 <sup>48</sup>    | Antenatal women                               | Laboratory: \$4 – 13        | NR                                                                                         | Hospitalisation for neonatal care: \$11,126                                                                                       | Labour: \$3.50-10.50                                   | Lifetime cost of care of neonatal HSV: \$48,519- 163,879                                    |
| Scott, 1998 <sup>35</sup>    | -                                             | HSV culture: \$80           | Acyclovir 400mg tds for 4 weeks: \$180                                                     | Hospitalisation for neonatal care: \$480-1470<br>Delivery: \$5,321 – 9,039                                                        | NR                                                     | NR                                                                                          |



|                                   |                                                                                                              |                            |                                                                           |                                  |                        |                                                           |
|-----------------------------------|--------------------------------------------------------------------------------------------------------------|----------------------------|---------------------------------------------------------------------------|----------------------------------|------------------------|-----------------------------------------------------------|
| Thung, 2005 <sup>49</sup>         | Married women                                                                                                | HSV screening: \$37.5-\$75 | Acyclovir 400mg tds for 4 weeks: \$71                                     | Delivery: \$4,281 - 9,283        | Counselling cost: \$13 | Lifetime cost of care of neonatal HSV: \$13,202 – 325,602 |
| Tuite, 2010 <sup>36</sup>         | Pregnant women                                                                                               | ELISA test: \$7-\$14       | NR                                                                        | Delivery: \$5680- 8780           | NR                     | Lifetime cost and consequence of neonatal HSV: \$164,870  |
| <b>Neonatal herpes management</b> |                                                                                                              |                            |                                                                           |                                  |                        |                                                           |
| Ambroggio, 2009 <sup>41</sup>     | Neonates with HSV and received intravenous acyclovir and discharge from Paediatric Health Information System | NR                         | Median pharmaceutical (not specified): \$4,231<br>Median Imaging: \$2,010 | Median hospital charge: \$37,431 | NR                     | NR                                                        |
| Donda, 2019 <sup>45</sup>         | Patients aged 28 days and above from the French national hospital discharge database                         | NR                         | NR                                                                        | Hospitalisation: \$27,843        | NR                     | NR                                                        |
| Flagg, 2011 <sup>51</sup>         | Neonates with ICD-9 codes for neonatal HSV                                                                   | NR                         | NR                                                                        | Hospitalisation: \$92,664        | NR                     | NR                                                        |

|                            |                                                                        |    |    |                                                                                |    |    |
|----------------------------|------------------------------------------------------------------------|----|----|--------------------------------------------------------------------------------|----|----|
|                            | in the National Inpatient Sample from 2003-2014                        |    |    |                                                                                |    |    |
| Mahant, 2019 <sup>50</sup> | Records of neonates from the Medicaid claims database from 2009 - 2015 | NR | NR | Hospitalisation: \$32,683<br>Hospital readmission: \$31,531<br>ED visit: \$527 | NR | NR |

\*All costs are mean costs except where explicitly labelled as median costs.

C/S – Caesarean section; ED - Emergency department; NR – Not reported

**Table 3: Detailed description of studies reporting resource utilization**

| Author, year                                             | Healthcare seeking and diagnosis                                                                                                                                                                                                                                                                                                                                                                                                      | Treatment phase                                                                                                                                                                                                                            |
|----------------------------------------------------------|---------------------------------------------------------------------------------------------------------------------------------------------------------------------------------------------------------------------------------------------------------------------------------------------------------------------------------------------------------------------------------------------------------------------------------------|--------------------------------------------------------------------------------------------------------------------------------------------------------------------------------------------------------------------------------------------|
| <b>Genital ulcer disease among adults/adolescents</b>    |                                                                                                                                                                                                                                                                                                                                                                                                                                       |                                                                                                                                                                                                                                            |
| Aslam, 2012 <sup>18</sup>                                | <ul style="list-style-type: none"> <li>74.1-93.2% sought care once within 12 months</li> <li>6.8-25.9% sought care twice to 8x a year</li> </ul>                                                                                                                                                                                                                                                                                      |                                                                                                                                                                                                                                            |
| Desharnais, 1996 <sup>44</sup>                           |                                                                                                                                                                                                                                                                                                                                                                                                                                       | <ul style="list-style-type: none"> <li>Oral treatment only: 16.1%</li> <li>IV treatment: 16.2%</li> <li>Hospital stay: 5.4 days</li> </ul>                                                                                                 |
| Fisman, 2005 <sup>19</sup>                               |                                                                                                                                                                                                                                                                                                                                                                                                                                       | <ul style="list-style-type: none"> <li>33.3% used antiviral drugs for HSV</li> <li>15.8% had pregnancy complicated by HSV</li> </ul>                                                                                                       |
| Gilbert, 2010 <sup>20</sup>                              | <ul style="list-style-type: none"> <li>1.32% of young adults ever tested for genital herpes</li> </ul>                                                                                                                                                                                                                                                                                                                                |                                                                                                                                                                                                                                            |
| Patrick, 2004 <sup>21</sup>                              | <ul style="list-style-type: none"> <li>49% had viral culture performed</li> <li>9% had antibody test</li> <li>34% had physical examination</li> </ul>                                                                                                                                                                                                                                                                                 | <ul style="list-style-type: none"> <li>65% received oral antiviral therapy</li> <li>18% received topical antiviral therapy</li> <li>17% obtained alternative therapy</li> </ul>                                                            |
| Tao, 2000 <sup>22</sup>                                  | <ul style="list-style-type: none"> <li>Estimated annual genital herpes visit 499,655 yearly</li> <li>2% were inpatient visit</li> <li>9% outpatient &amp; ED visit</li> <li>20% public STD clinic</li> <li>69% private office based visit</li> </ul>                                                                                                                                                                                  |                                                                                                                                                                                                                                            |
| Xia, 2018 <sup>40</sup>                                  | <p>From 2006-2013</p> <ul style="list-style-type: none"> <li>245,484 ED visits with primary diagnosis of genital herpes or 37.3% of total ED visits for HSV</li> <li>Total charges: \$278,335,295</li> </ul> <p>ED visits trend from 2006 – 2013</p> <ul style="list-style-type: none"> <li>24,747 (33.8%); 26,440 (34.1%); 27,484 (36.1%), 28,440 (36.5%); 33,258 (37.8%); 33,095 (38.3%); 35,501 (40.0%); 36,518 (40.3%)</li> </ul> |                                                                                                                                                                                                                                            |
| <b>Neonatal herpes prevention among pregnant mothers</b> |                                                                                                                                                                                                                                                                                                                                                                                                                                       |                                                                                                                                                                                                                                            |
| Baker, 2004 <sup>42</sup>                                | <p>Estimates used in model</p> <ul style="list-style-type: none"> <li>75% of partners will be willing to undergo HSV screening</li> </ul>                                                                                                                                                                                                                                                                                             | <p>Estimates used in model</p> <ul style="list-style-type: none"> <li>1.32% women HSV-2 negative acquiring HSV during last 8 weeks of pregnancy</li> <li>57% women or partner offered and accept antiviral therapy with testing</li> </ul> |

|                                  |                                                                                                                                                                                                                                                                                                                         |                                                                                                                                                                                                                                                                                                                                                                                                                                                                                                                                                                                                                                 |
|----------------------------------|-------------------------------------------------------------------------------------------------------------------------------------------------------------------------------------------------------------------------------------------------------------------------------------------------------------------------|---------------------------------------------------------------------------------------------------------------------------------------------------------------------------------------------------------------------------------------------------------------------------------------------------------------------------------------------------------------------------------------------------------------------------------------------------------------------------------------------------------------------------------------------------------------------------------------------------------------------------------|
|                                  |                                                                                                                                                                                                                                                                                                                         | <ul style="list-style-type: none"> <li>82% women taking antivirals from week 36 compliant</li> </ul>                                                                                                                                                                                                                                                                                                                                                                                                                                                                                                                            |
| Binkin, 1989 <sup>43</sup>       | <p>Estimates used in model</p> <ul style="list-style-type: none"> <li>Average number of cultures per patient: 8</li> </ul>                                                                                                                                                                                              |                                                                                                                                                                                                                                                                                                                                                                                                                                                                                                                                                                                                                                 |
| Brocklehurst, 1995 <sup>23</sup> | <ul style="list-style-type: none"> <li>60% of obstetricians advocated some form of antenatal screening</li> </ul> <p>Among those performing screening</p> <ul style="list-style-type: none"> <li>64% perform regular viral cultures</li> <li>54% recommend screening <math>\leq 34</math> weeks of gestation</li> </ul> | <ul style="list-style-type: none"> <li>92% of providers: visible active lesions at labor are cause for caesarean delivery</li> </ul>                                                                                                                                                                                                                                                                                                                                                                                                                                                                                            |
| Brown, 2003 <sup>27</sup>        |                                                                                                                                                                                                                                                                                                                         | <ul style="list-style-type: none"> <li>All women with HSV genital lesions noted at delivery had caesarean delivery (n=60) unless lesions not noted until too late to proceed with caesarean or lesions noted after delivery (n=14)</li> </ul>                                                                                                                                                                                                                                                                                                                                                                                   |
| Heggarty, 2020 <sup>28</sup>     | <p>For suspected primary genital HSV:</p> <ul style="list-style-type: none"> <li>43.3% would conduct PCR of lesions plus HSV serology</li> <li>39.9% would conduct PCR of lesions alone</li> <li>0.4% would conduct HSV serology only</li> </ul>                                                                        | <ul style="list-style-type: none"> <li>If primary HSV GUD during pregnancy, 68.4% “always” and 11.6% “often” prescribe antiviral prophylaxis in 3<sup>rd</sup> trimester</li> <li>If recurrent HSV GUD during pregnancy, 55.1% “always” and 12.9% “often” prescribe antiviral prophylaxis in 3<sup>rd</sup> trimester</li> <li>83% recommend caesarean delivery if genital HSV lesions suspected during labour</li> </ul>                                                                                                                                                                                                       |
| Kenny, 2013 <sup>26</sup>        | <ul style="list-style-type: none"> <li>30% physicians will perform type-specific serology “most of the time” for patients with no history of herpes but partner with known HSV</li> </ul>                                                                                                                               | <ul style="list-style-type: none"> <li>Antiviral suppressive therapy prescribed in third trimester by 90% of doctors (97% of obstetricians and 84% family physicians) <ul style="list-style-type: none"> <li>62% prescribed for any past history of GUD including pre-pregnancy</li> <li>28% only after outbreak during pregnancy</li> <li>More commonly prescribed acyclovir (63%) than valacyclovir (38%)</li> </ul> </li> <li>65% offer elective caesarean if primary HSV in third trimester</li> <li>95% of obstetricians and 84% of family physicians recommend caesarean delivery if HSV lesions during labour</li> </ul> |
| Little, 2005 <sup>46</sup>       |                                                                                                                                                                                                                                                                                                                         | <p>Estimates used in model</p> <ul style="list-style-type: none"> <li>24% of women will undergo caesarean delivery if no lesion was present</li> </ul>                                                                                                                                                                                                                                                                                                                                                                                                                                                                          |

|                                        |                                                                                                                                           |                                                                                                                                                                                                                                                                                                                                                                                                                                                                                 |
|----------------------------------------|-------------------------------------------------------------------------------------------------------------------------------------------|---------------------------------------------------------------------------------------------------------------------------------------------------------------------------------------------------------------------------------------------------------------------------------------------------------------------------------------------------------------------------------------------------------------------------------------------------------------------------------|
| Lynn, 2017 <sup>24</sup>               | <ul style="list-style-type: none"> <li>89% of patients had type-specific serology sent</li> </ul>                                         | <ul style="list-style-type: none"> <li>63% received antiviral prophylaxis <ul style="list-style-type: none"> <li>98.5% received valacyclovir</li> <li>1.5% received acyclovir</li> <li>Mean for initiating: week 36</li> </ul> </li> <li>29% of patients underwent caesarean delivery, none for HSV</li> </ul>                                                                                                                                                                  |
| Rouse, 2000 <sup>48</sup>              | <p>Estimates used in model</p> <ul style="list-style-type: none"> <li>75% of partners will be willing to undergo HSV screening</li> </ul> |                                                                                                                                                                                                                                                                                                                                                                                                                                                                                 |
| Stankiewicz Karita, 2017 <sup>25</sup> |                                                                                                                                           | <ul style="list-style-type: none"> <li>Antiviral suppressive therapy: <ul style="list-style-type: none"> <li>55% HSV-2 antibody-positive only</li> <li>65% history of symptomatic GUD</li> </ul> </li> <li>Similar caesarean section rates for women with/without history of HSV/genital herpes: <ul style="list-style-type: none"> <li>25% without history of HSV-2/GH</li> <li>30% on suppressive treatment</li> </ul> </li> <li>28% without suppressive treatment</li> </ul> |
| <b>Neonatal herpes management</b>      |                                                                                                                                           |                                                                                                                                                                                                                                                                                                                                                                                                                                                                                 |
| Ahmad, 2015 <sup>15</sup>              | <ul style="list-style-type: none"> <li>CSF PCR performed in 92.3%</li> <li>Blood PCR performed in 48.7%</li> </ul>                        | <ul style="list-style-type: none"> <li>9.4 – 9.8% require ICU stay</li> <li>Hospital stay: 83.1-84.6hr</li> <li>71.8% received acyclovir</li> </ul>                                                                                                                                                                                                                                                                                                                             |
| Ambroggio, 2009 <sup>41</sup>          |                                                                                                                                           | <ul style="list-style-type: none"> <li>Median length of stay: 13 days (IQR 4-21)</li> </ul>                                                                                                                                                                                                                                                                                                                                                                                     |
| Bernard, 2013 <sup>16</sup>            |                                                                                                                                           | <ul style="list-style-type: none"> <li>Mean hospital admission: 28 -34 days</li> </ul>                                                                                                                                                                                                                                                                                                                                                                                          |
| Donda, 2019 <sup>45</sup>              |                                                                                                                                           | <ul style="list-style-type: none"> <li>Median length of stay: 20</li> </ul>                                                                                                                                                                                                                                                                                                                                                                                                     |
| Flagg, 2011 <sup>51</sup>              |                                                                                                                                           | <ul style="list-style-type: none"> <li>Mean length of stay: 22 days</li> <li>Median length of stay: 2- days</li> </ul>                                                                                                                                                                                                                                                                                                                                                          |
| Mahant, 2019 <sup>50</sup>             |                                                                                                                                           | <ul style="list-style-type: none"> <li>Median hospital stay: 18 days</li> <li>Post discharge, <ul style="list-style-type: none"> <li>45.7% required ED visit</li> <li>16.2% required rehospitalisation</li> </ul> </li> </ul>                                                                                                                                                                                                                                                   |
| Owusu-Edusei, 2015 <sup>17</sup>       |                                                                                                                                           | <ul style="list-style-type: none"> <li>Mean hospital stay: 10.8 (11.5)</li> <li>Mean hospital stay among those with admission &gt;7 days: 18.5 (12.5)</li> </ul>                                                                                                                                                                                                                                                                                                                |

**Table 4: Detailed cost incurred in genito-ulcer diseases due to HSV**

| Author,year             | Outcomes                                                   | Unit cost (\$) in original year | Unit cost in 2018 (\$) |
|-------------------------|------------------------------------------------------------|---------------------------------|------------------------|
| <b>Medication costs</b> |                                                            |                                 |                        |
| Vickerman, 2008         | One dose of IV benzathine penicillin 2.4MU                 | 0.15 - 0.48                     | 0.19-0.59              |
| Vickerman, 2008         | One tab of 500mg ciprofloxacin                             | 0.10 - 0.21                     | 0.12 - 0.26            |
| Vickerman, 2008         | One cap of 200mg acyclovir                                 | 0.53- 5.24                      | 0.66 – 6.48            |
| Fisman, 2003            | Acyclovir therapy for relapse patients                     | 16.00                           | 22.72                  |
| Fisman, 2003            | Acyclovir cost for suppressive monthly therapy             | 40.00                           | 56.80                  |
| Almonte-Vega, 2020      | Acyclovir therapy                                          | 86.33                           | 86.33                  |
| Fisman, 2003            | Condom cost                                                | 0.10                            | 0.14                   |
| Szucs, 2001             | Pharmacological treatment 1 <sup>st</sup> episode (NS)     | 64.00                           | 94.86                  |
| Szucs, 2001             | Pharmacological treatment recurrent episode (NS)           | 131.00                          | 194.18                 |
| Vickerman, 2008         | Needle and syringe cost                                    | 0.15                            | 0.19                   |
| Tao, 2000               | Pharmacy claim                                             | 52.00                           | 73.84                  |
| <b>Laboratory test</b>  |                                                            |                                 |                        |
| Szucs, 2001             | Antibiotic testing based on expert opinion                 | 76.50                           | 113.39                 |
| Szucs, 2001             | Antibiotic testing in first episode based on claims        | 12.80                           | 18.97                  |
| Szucs, 2001             | Antibiotic testing in subsequent episode based on claims   | 6.50                            | 9.63                   |
| Szucs, 2001             | Complete blood count based on expert opinion               | 21.29                           | 31.56                  |
| Szucs, 2001             | Complete blood count in first episode based on claims      | 4.60                            | 6.82                   |
| Szucs, 2001             | Complete blood count in subsequent episode based on claims | 1.50                            | 2.22                   |
| Szucs, 2001             | Microbiological test for first GUD episode                 | 17.60                           | 26.09                  |
| Szucs, 2001             | Microbiological test for subsequent GUD episode            | 6.70                            | 9.93                   |
| Szucs, 2001             | Microbiological test based on expert opinion               | 38.39                           | 56.90                  |
| Almonte-Vega, 2020      | Microbiological lab test                                   | 80.17                           | 80.17                  |

|                             |                                                                                            |          |         |
|-----------------------------|--------------------------------------------------------------------------------------------|----------|---------|
| Fisman, 2003                | Western blot                                                                               | 60.00    | 85.20   |
| Szucs, 2001                 | Urine analysis based on expert opinion                                                     | 12.59    | 18.66   |
| Szucs, 2001                 | Urine analysis in first episode based on claims                                            | 4.60     | 6.82    |
| Szucs, 2001                 | Urine analysis in subsequent episode based on claims                                       | 3.20     | 4.74    |
| <b>Hospitalisation cost</b> |                                                                                            |          |         |
| Fisman, 2003                | Excess obstetrical cost associated with history of symptomatic HSV2 infection              | 300.00   | 425.98  |
| Fisman, 2003                | Excess obstetrical cost due to symptomatic HSV2 infection                                  | 310.00   | 440.18  |
| Tao, 2000                   | Inpatient cost                                                                             | 2,530.00 | 3592.46 |
| Szucs, 2001                 | Hospital day                                                                               | 669.00   | 991.63  |
| <b>Clinic visit</b>         |                                                                                            |          |         |
| Fisman, 2003                | Clinic visit related to GUD (for physician time, test, lost wages due to 2hr patient time) | 120.00   | 170.39  |
| Szucs, 2001                 | Clinical examination based on expert opinion                                               | 40.33    | 59.78   |
| Szucs, 2001                 | Clinical examination first episode based on claims                                         | 39.80    | 58.99   |
| Szucs, 2001                 | Clinical examination on subsequent episode based on claims                                 | 36.20    | 53.66   |
| Szucs, 2001                 | Physician consultation based on expert opinion                                             | 73.00    | 108.21  |
| Szucs, 2001                 | Physician consultation in first episode based on claims                                    | 62.60    | 92.79   |
| Szucs, 2001                 | Physician consultation in subsequent episode based on claims                               | 59.60    | 88.34   |
| Tao, 2000                   | Outpatient and ED                                                                          | 59.00    | 83.78   |
| Fisman, 2003                | Outpatient visit                                                                           | 120.00   | 170.39  |
| Tao, 2000                   | Office based physician and public clinic                                                   | 67.00    | 95.14   |
| Almonte-Vega, 2020          | Consultation, clinical examination and diagnostic                                          | 161.85   | 161.85  |
| Vickerman, 2008             | Counselling cost                                                                           | 0.28     | 0.35    |
| <b>Other costs</b>          |                                                                                            |          |         |
| Szucs, 2001                 | Others miscellaneous cost related to first GUD episode(not reported)                       | 33.00    | 48.91   |

|              |                                                                                                             |        |         |
|--------------|-------------------------------------------------------------------------------------------------------------|--------|---------|
| Szucs, 2001  | Others miscellaneous cost related to recurrent GUD episode(not reported)                                    | 12.30  | 18.23   |
| Szucs, 2001  | Production losses                                                                                           | 60.00  | 88.94   |
| Szucs, 2001  | Total cost of active GUD                                                                                    | 355.00 | 526.20  |
| Szucs, 2001  | Total cost of incident GUD                                                                                  | 235.00 | 348.33  |
| Szucs, 2001  | Total cost of prevalent GUD                                                                                 | 166.00 | 246.06  |
| Szucs, 2001  | Total cost of recurrent GUD                                                                                 | 499.00 | 739.65  |
| Fisman, 2003 | Treatment cost for men assuming 2 clinic visit, 7 day course of acyclovir (400mg tds) and 2 days off work   | 450.00 | 638.97  |
| Fisman, 2003 | Treatment cost for women assuming 2 clinic visit, 7 day course of acyclovir (400mg tds) and 2 days off work | 800.00 | 1135.95 |



**Table 5: Detailed cost associated with genitoulcer disease prevention in people living with HIV**

| Author, year    | Outcomes                                                     | Unit cost (\$) in original year | Unit cost in 2018 (\$) |
|-----------------|--------------------------------------------------------------|---------------------------------|------------------------|
| Vickerman, 2011 | Acyclovir 400mg                                              | 0.07                            | 0.07                   |
| Vickerman, 2011 | Staff cost- for default tracer over 3 months                 | 24.00                           | 22.32                  |
| Vickerman, 2011 | Staff cost for training for STI diagnosis and default tracer | 0.46                            | 0.43                   |
| Vickerman, 2011 | Labour cost for senior nurse                                 | 2.52                            | 2.34                   |
| Vickerman, 2011 | Counselling cost (10 mins)                                   | 0.88                            | 0.82                   |
| Vickerman, 2011 | CD-4 count test                                              | 7.90                            | 7.35                   |

*NB- Cost reported after adjustment in 2017 were lower than those in the original study due to exchange rates at the time of study.*

**Table 6: Detailed cost associated with neonatal herpes prevention/management**

| Author,year                 | Outcomes                                                                               | Unit cost (USD\$) | Unit cost in 2017 (\$) |
|-----------------------------|----------------------------------------------------------------------------------------|-------------------|------------------------|
| <b>Medication costs</b>     |                                                                                        |                   |                        |
| Randolph, 1996              | One cap of acyclovir 400mg                                                             | 1.14              | 1.72                   |
| Baker, 2004                 | Pharmaceutical cost for pregnant women                                                 | 6.18              | 8.10                   |
| Baker, 2004                 | Pharmaceutical cost for partner                                                        | 3.93              | 5.15                   |
| Baker, 2004                 | Valacyclovir 500mg                                                                     | 3.95              | 5.18                   |
| Baker, 2004                 | Valacyclovir 1000mg                                                                    | 6.49              | 8.51                   |
| Baker, 2004                 | Acyclovir 400mg                                                                        | 1.96              | 2.57                   |
| Barnabas, 2002              | Acyclovir treatment for a couple for one pregnancy                                     | 37.00             | 51.37                  |
| Scott, 1998                 | Acyclovir 400mg                                                                        | 1.71              | 2.58                   |
| <b>Laboratory test</b>      |                                                                                        |                   |                        |
| Randolph, 1996              | Screening using herpes culture                                                         | 35.00             | 52.83                  |
| Thung, 2005                 | HSV1 or 2 screening cost                                                               | 37.50             | 49.15                  |
| Thung, 2005                 | HSV 1 and 2 screening                                                                  | 75.00             | 98.31                  |
| Rouse, 2000                 | HSV-2 antibody assay                                                                   | 4.00              | 5.68                   |
| Rouse, 2000                 | HSV-2 labour and reagent cost, QC etc                                                  | 9.00              | 12.78                  |
| Tuite, 2010                 | ELISA screening for HSV                                                                | 7.00              | 7.96                   |
| Scott, 1998                 | HSV culture                                                                            | 80.00             | 120.75                 |
| Baker, 2004                 | Labor and supplies for HSV-2 specific test                                             | 15.58             | 20.42                  |
| Baker, 2004                 | HSV test for partner                                                                   | 40.53             | 53.12                  |
| Barnabas, 2002              | Diagnostic kit cost                                                                    | 70.00             | 97.18                  |
| Binkin, 1989                | Viral culture                                                                          | 30.00             | 52.97                  |
| <b>Hospitalisation cost</b> |                                                                                        |                   |                        |
| Scott, 1998                 | Vaginal delivery with metritis, includes labour, delivery, postpartum and professional | 8439.00           | 12,737.15              |

|                     |                                                                                             |           |           |
|---------------------|---------------------------------------------------------------------------------------------|-----------|-----------|
| Scott, 1998         | Vaginal delivery without metritis, includes labour, delivery, postpartum and professional   | 5,321.00  | 8,031.09  |
| Ambroggio, 2009     | Hospital charges                                                                            | 62,050.90 | 70,544.69 |
| Tuite, 2010         | Vaginal delivery                                                                            | 5,680.00  | 6,457.50  |
| Little, 2005        | Vaginal delivery                                                                            | 4,939.00  | 6,104.17  |
| Randolph, 1996      | Caesarean delivery over vaginal                                                             | 3,500.00  | 5,282.62  |
| Tuite, 2010         | Caesarean section                                                                           | 8,780.00  | 9,981.84  |
| Tao, 1999           | Caesarean attributable to genital herpes                                                    | 1,922.00  | 2729.13   |
| Little, 2005        | Caesarean delivery                                                                          | 9,490.00  | 11,728.80 |
| Little, 2005        | Caesarean delivery with lesion                                                              | 7,608.00  | 9,402.82  |
| Scott, 1998         | Caesarean delivery with metritis, includes labour, delivery, postpartum and professional    | 9,039.00  | 13,642.74 |
| Scott, 1998         | Caesarean delivery without metritis, includes labour, delivery, postpartum and professional | 10,553.00 | 15,927.85 |
| Thung, 2005         | Elective caesarean                                                                          | 7,425.00  | 9,732.37  |
| Thung, 2005         | Labour caesarean                                                                            | 9,283.00  | 12,167.75 |
| Little, 2005        | Hospital care due to neonatal herpes infection                                              | 32,483.00 | 40,146.12 |
| Rouse, 2000         | Hospital care due to neonatal herpes infection                                              | 11,126.00 | 15,798.28 |
| Baker, 2004         | Caesarean delivery                                                                          | 5,021.00  | 6,581.31  |
| Binkin, 1989        | Hospital stay due to complication                                                           | 698.00    | 1,232.38  |
| Binkin, 1989        | Hospital care due to neonatal herpes infection                                              | 25,000.00 | 44,139.53 |
| Barnabas, 2002      | Caesarean delivery with lesion                                                              | 11,084.00 | 15,388.48 |
| <b>Clinic visit</b> |                                                                                             |           |           |
| Scott, 1998         | Clinic visit                                                                                | 39.50     | 59.62     |
| Thung, 2005         | Counselling cost                                                                            | 13.00     | 17.04     |
| Rouse, 2000         | Counselling cost (10 mins)                                                                  | 3.50      | 4.97      |
| Rouse, 2000         | Counselling cost for couple (30 mins)                                                       | 10.50     | 14.91     |
| Randolph, 1996      | Follow-up call and office visit following screening                                         | 74.00     | 111.69    |
| Barnabas, 2002      | Pharmacy dispensing and education cost                                                      | 3.00      | 4.17      |
| Barnabas, 2002      | Obstetrician counselling and testing salary for screening                                   | 19.00     | 26.38     |

|                            |                                                                 |              |              |
|----------------------------|-----------------------------------------------------------------|--------------|--------------|
| Barnabas, 2002             | Obstetrician counselling and testing salary for treatment       | 12.00        | 16.66        |
| <b>Long-term care cost</b> |                                                                 |              |              |
| Scott, 1998                | Infant treated for HSV (include drug and culture)               | 1,470.00     | 2,218.70     |
| Scott, 1998                | Neonatal care if using caesarean delivery                       | 821.00       | 1,239.15     |
| Scott, 1998                | Neonatal care if using vaginal delivery                         | 480.00       | 724.47       |
| Randolph, 1996             | Neonatal herpes acute hospital care                             | 10,160.00    | 15,334.69    |
| Thung, 2005                | Acute and long term care for normal/mild deficit                | 13,202.00    | 17,304.61    |
| Randolph, 1996             | Long term medical cost for moderate disability (Y1-Y65)         | 85,000.00    | 128,292.20   |
| Thung, 2005                | Acute and long term care for moderate deficit                   | 134,202.00   | 175,906.12   |
| Little, 2005               | Lifetime cost and care for moderately disabled child            | 349,753.00   | 432,263.77   |
| Rouse, 2000                | Lifetime cost and care for moderately disabled child 1999       | 48,519.00    | 68,894.21    |
| Baker, 2004                | Lifetime medical and institutionalised cost for neonatal herpes | 92,350.00    | 121,048.35   |
| Binkin, 1989               | Lifetime cost and care for moderately disabled child            | 125,000.00   | 220,697.66   |
| Fisman, 2003               | Lifetime cost of neonatal HSV with moderate neurological sequel | 97,000.00    | 13,7734.46   |
| Randolph, 1996             | Long term medical cost for severe disability (Y1-Y65)           | 255,000.00   | 384,876.59   |
| Thung, 2005                | Acute and long term care for severe deficit                     | 325,602.00   | 426,784.88   |
| Little, 2005               | Lifetime cost and care for severely disabled child              | 1,049,260.00 | 1,296,792.56 |
| Rouse, 2000                | Lifetime cost and care for severely disabled child              | 163,879.00   | 232,698.82   |
| Binkin, 1989               | Lifetime cost and care for severely disabled child              | 250,000.00   | 441,395.33   |
| Fisman, 2003               | Lifetime cost of neonatal HSV with severe neurological sequel   | 291,000.00   | 413,203.38   |
| Tuite, 2010                | Lifetime cost of neonatal HSV                                   | 164,870.00   | 187,438.10   |
| Fisman, 2003               | Lifetime cost of neonatal HSV                                   | 110,000.0    | 156,193.72   |
| Baker, 2004                | Counselling cost nurse (15 mins)                                | 5.98         | 7.84         |
| Baker, 2004                | Counselling cost physician (5 mins)                             | 6.67         | 8.74         |
| Baker, 2004                | Labour cost and supplies                                        | 15.58        | 20.42        |
| Baker, 2004                | Total cost without screening program                            | 1,181.35     | 1,548.46     |
| Baker, 2004                | Total cost with screening for women                             | 1,211.95     | 1,588.57     |
| Baker, 2004                | Total cost with screening for women and partner                 | 1,267.24     | 1,661.04     |

|                |                                                    |            |            |
|----------------|----------------------------------------------------|------------|------------|
| Barnabas, 2002 | Maternal mortality cost                            | 443,858.00 | 616,230.57 |
| Thung, 2005    | Mortality cost                                     | 13,202.00  | 17,304.61  |
| Barnabas, 2002 | Neonatal care after caesarean                      | 885.00     | 1228.69    |
| Barnabas, 2002 | Medical services for care of neonatal herpes       | 273,712.00 | 380,008.25 |
| Barnabas, 2002 | Long term care for neonatal herpes                 | 140,766.00 | 195,432.58 |
| Barnabas, 2002 | Caregiver cost for neonates due to neonatal herpes | 149,943.00 | 208,173.47 |

Figure 1: Methodological quality of included economic studies using CHEC Checklist

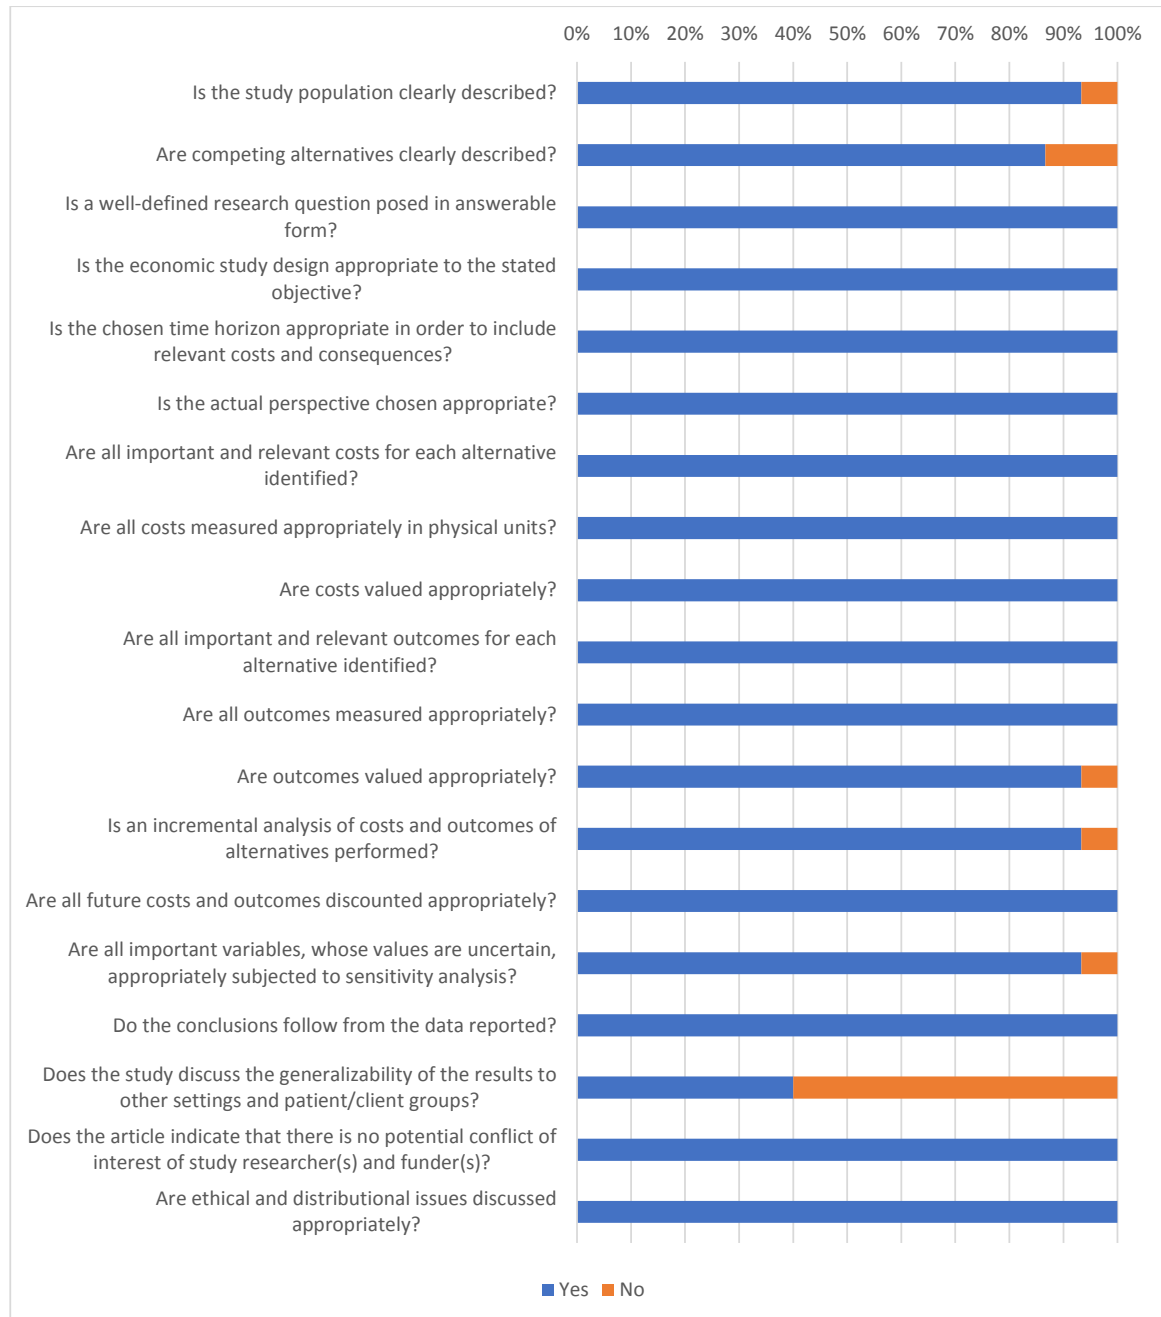

**Figure 2: Methodological quality of included costing studies using Larg and Moss Checklist**

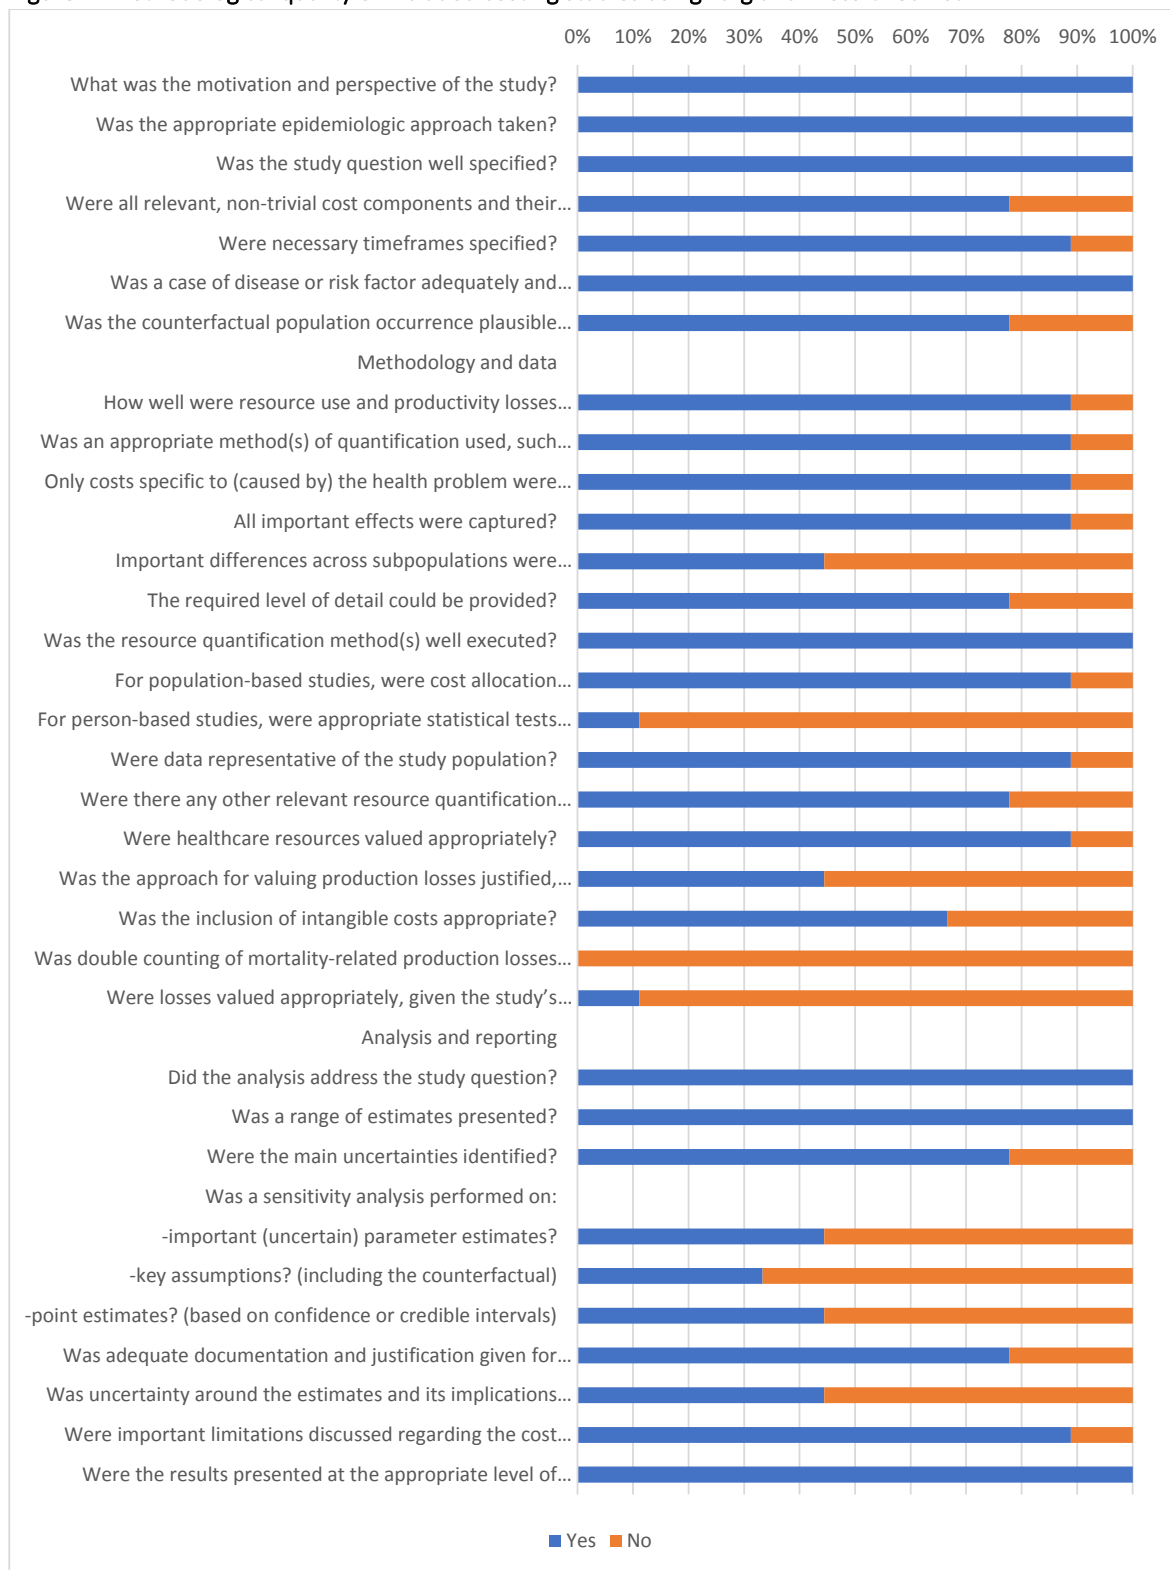

Supplement: bmjopen-2021-049618supp001_data_supplement.pdf [file bmjopen-2021-049618supp001_data_supplement.pdf]
